# Supplementary material
Source: MDPI journal article supplement (https://www.mdpi.com/2227-9717/12/4/788)
Supplement: s1 [file s1]

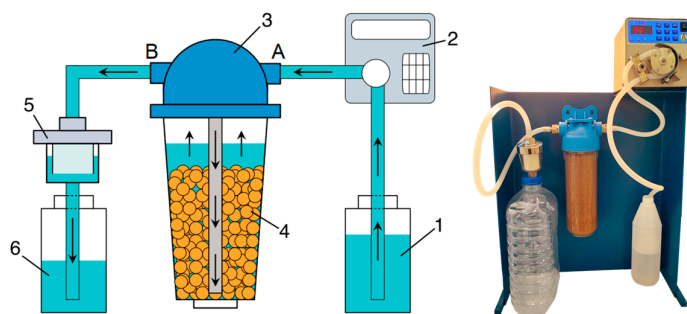

**Figure S1.** Laboratory unit for continuous ethanol drying on zeolite (1 – wet alcohol container; 2 – peristaltic pump; 3 – flow-through water filter housing; 4 – zeolite; 5 – zeolite dust filter; 6 – container of dry alcohol).

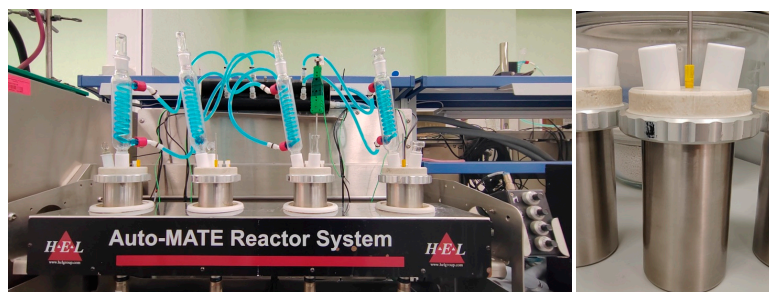

**Figure S2.** Auto-MATE Reactor System with perfect-mixing reactors.

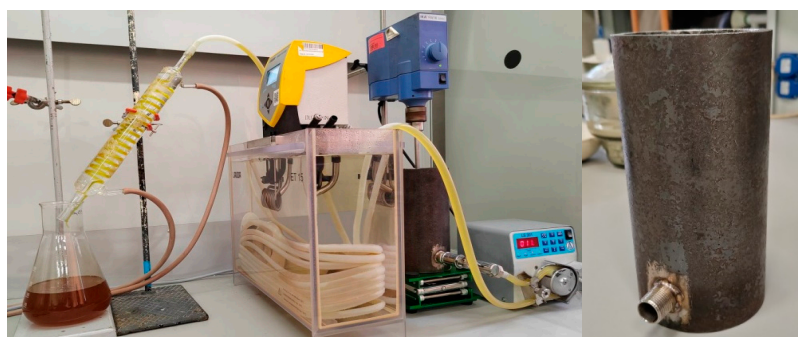

**Figure S3.** Laboratory unit for the synthesis of FAEE in the PFR.

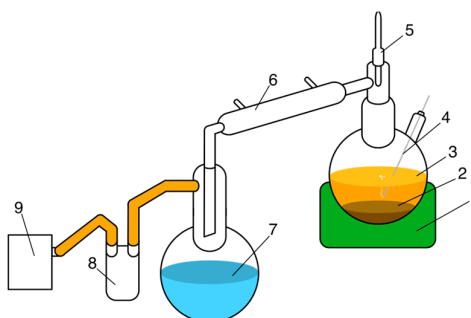

**Figure S4.** Ethanol separation unit: 1 – heating mantle; 2 – glycerol phase; 3 – FAEE phase; 4 – glass capillary; 5 – thermometer; 6 – Liebig condenser; 7 – collection flask; 8 – water trap with air inlet tap; 9 – vacuum pump.

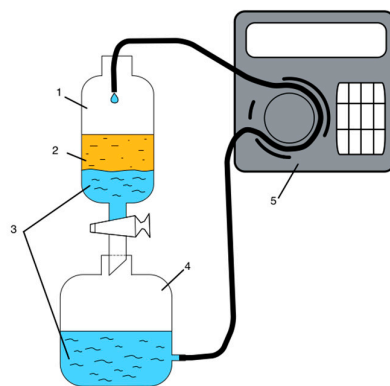

**Figure S5.** FAEE flushing unit: 1 – separating funnel; 2 – FAEE; 3 –  $\text{H}_2\text{SO}_4$  flushing solution; 4 – tank for the supply of acid flushing solution; 5 – peristaltic pump.

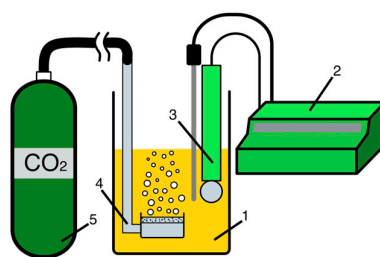

**Figure S6.** Laboratory barbotage unit: 1 – FAEE phase; 2 – pH-meter; 3 – pH-meter electrode; 4 – gas washer; 5 – carbon dioxide tank.

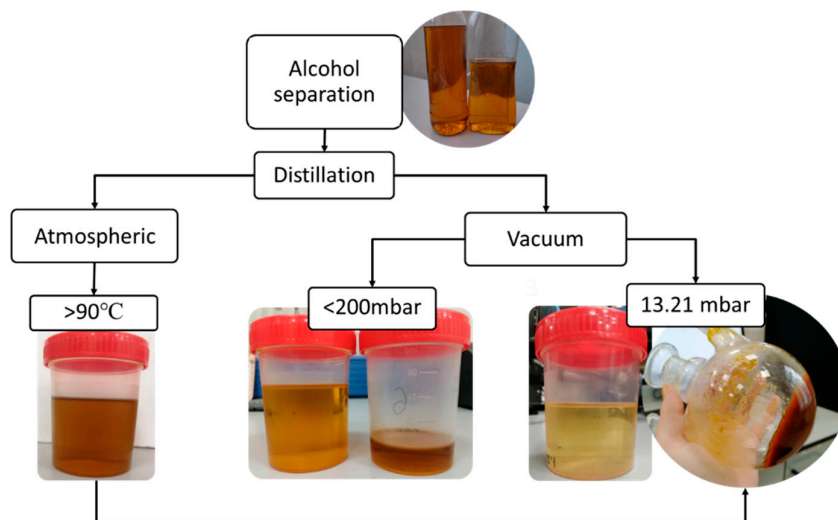

**Figure S7.** The ethanol separation results.

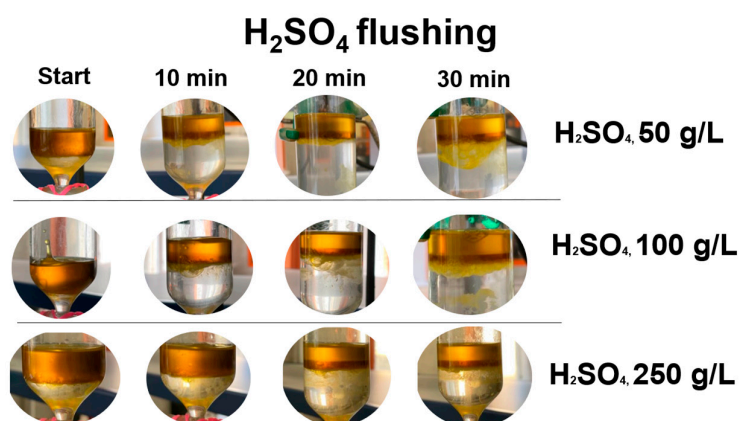

Figure S8. H<sub>2</sub>SO<sub>4</sub> flushing results.

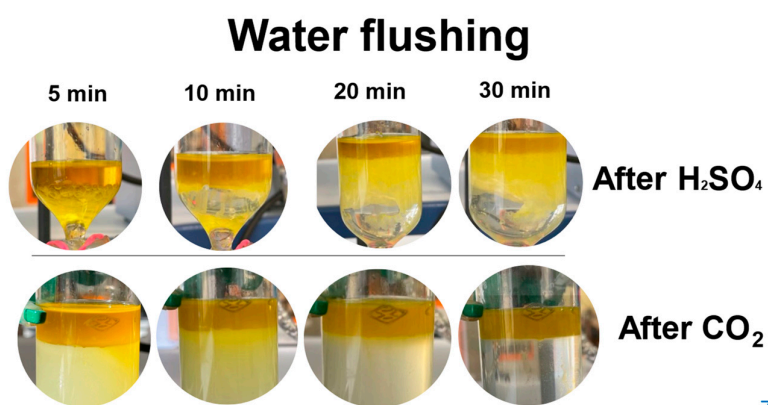

Figure S9. Water flushing results.

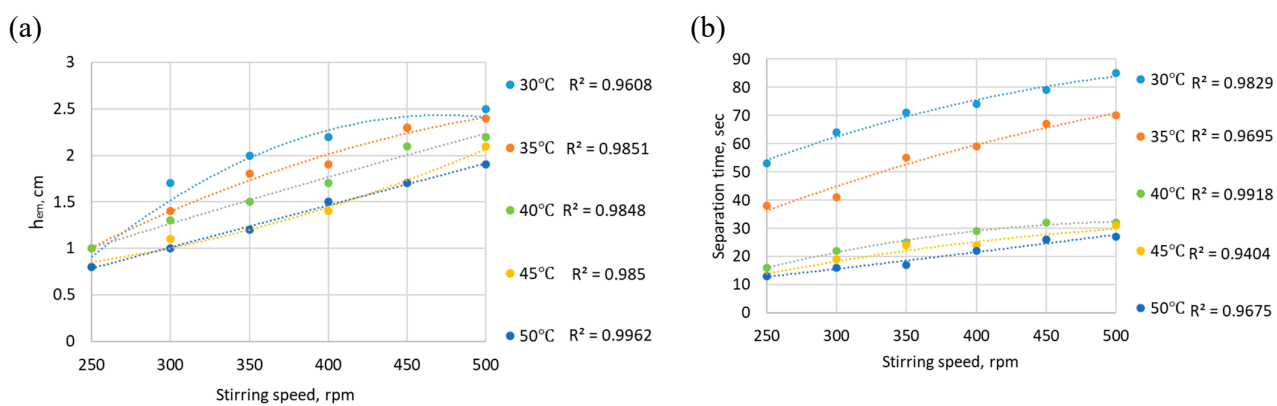

Figure S10. Dependences of emulsion height and separation time on the stirring speed in ethyloleate-water system.

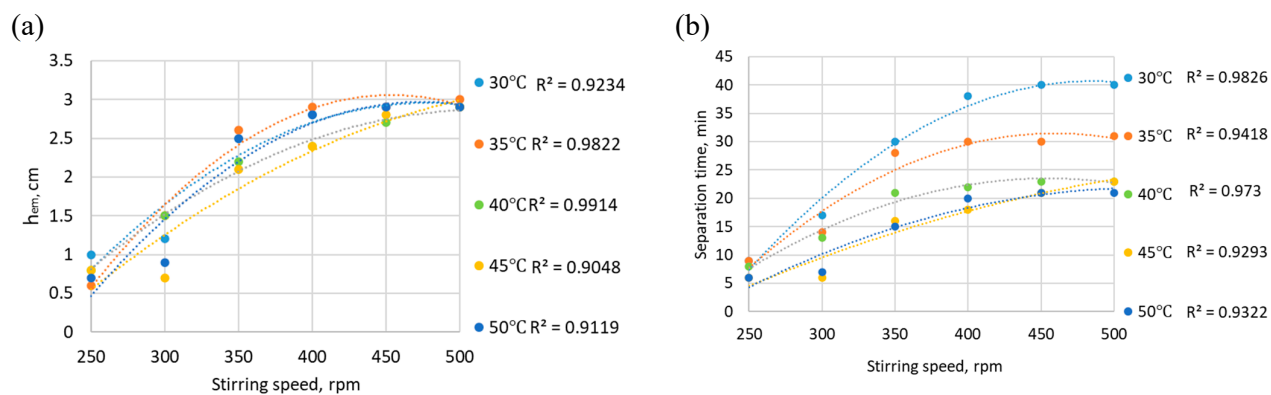

**Figure S11.** Dependences of emulsion height and separation time on the stirring speed in FAEE phase-water system.

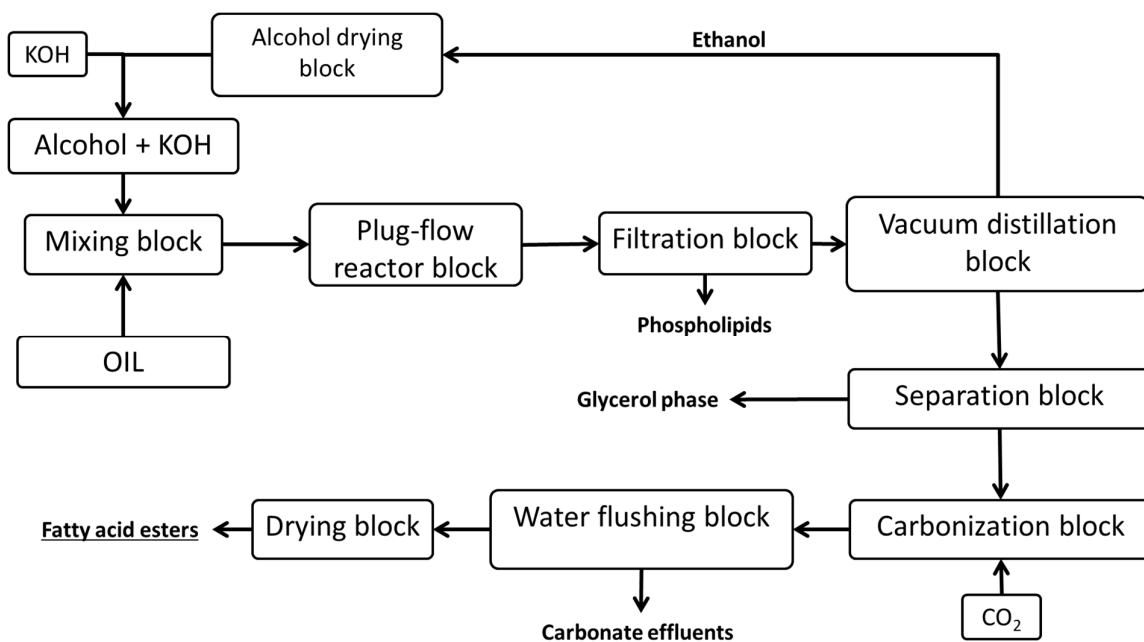

**Figure S12.** Principal technological scheme of FAEE production in PFR.
